# Supplementary material for: Alternative splicing of METTL3 explains apparently METTL3-independent m6A modifications in mRNA
Source: PubMed Central journal article supplement (PMC9295969; doi:10.1371/journal.pbio.3001683), 2022-07-19

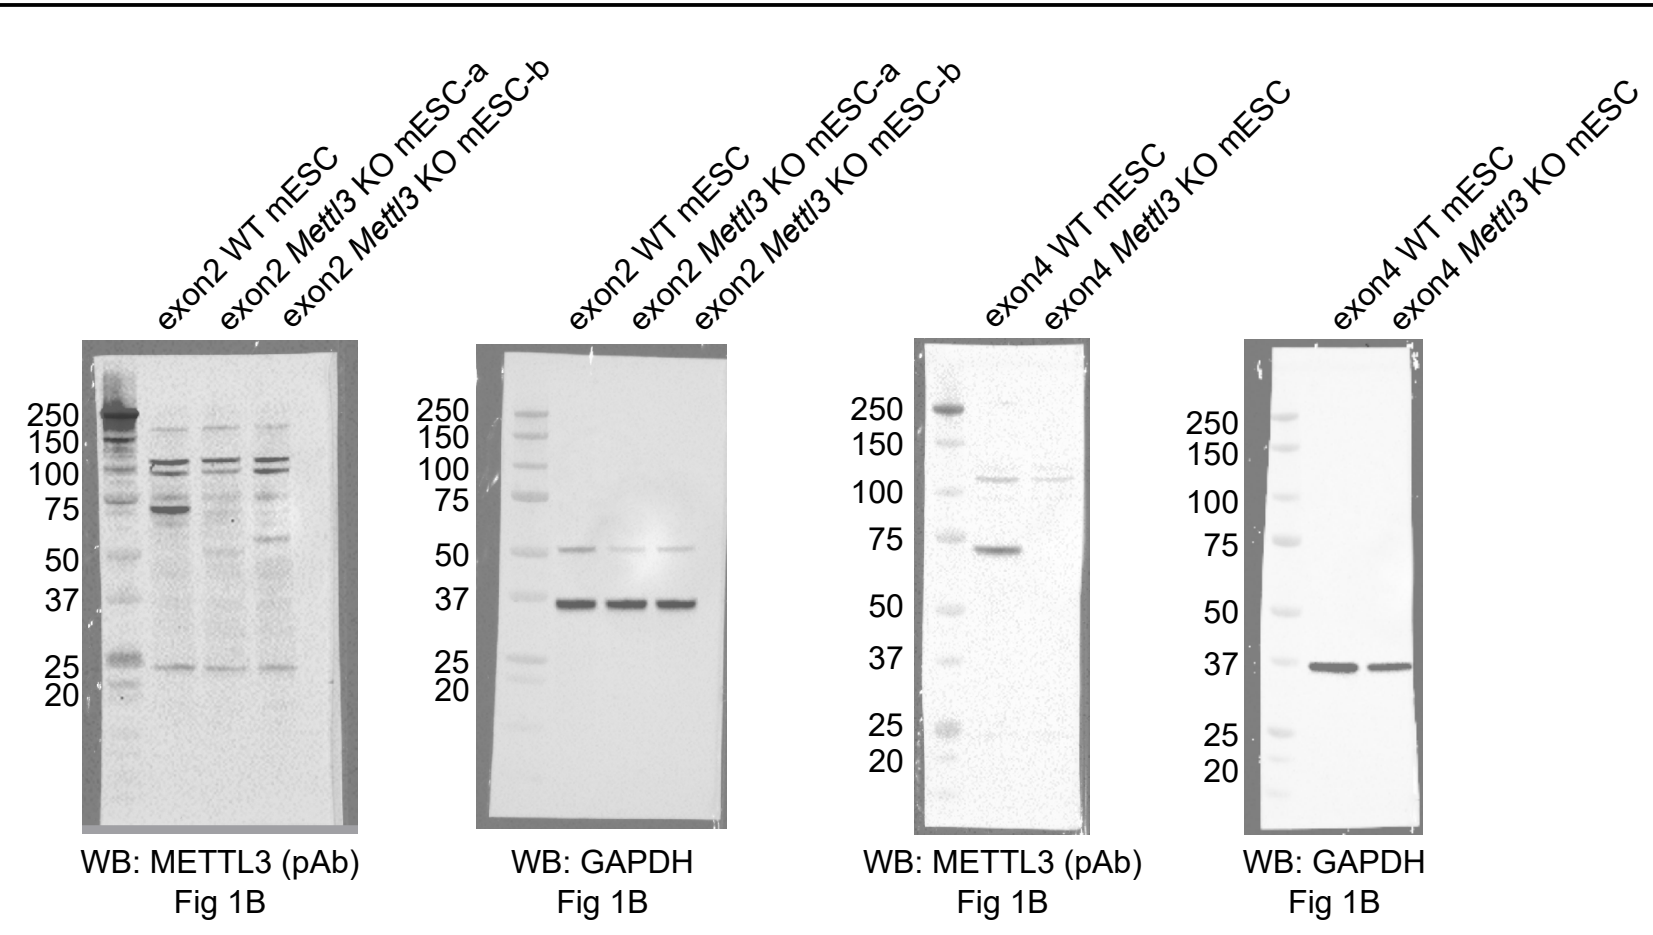

5' RACE PCR primer set 1      5' RACE PCR primer set 2      5' RACE PCR primer set 3

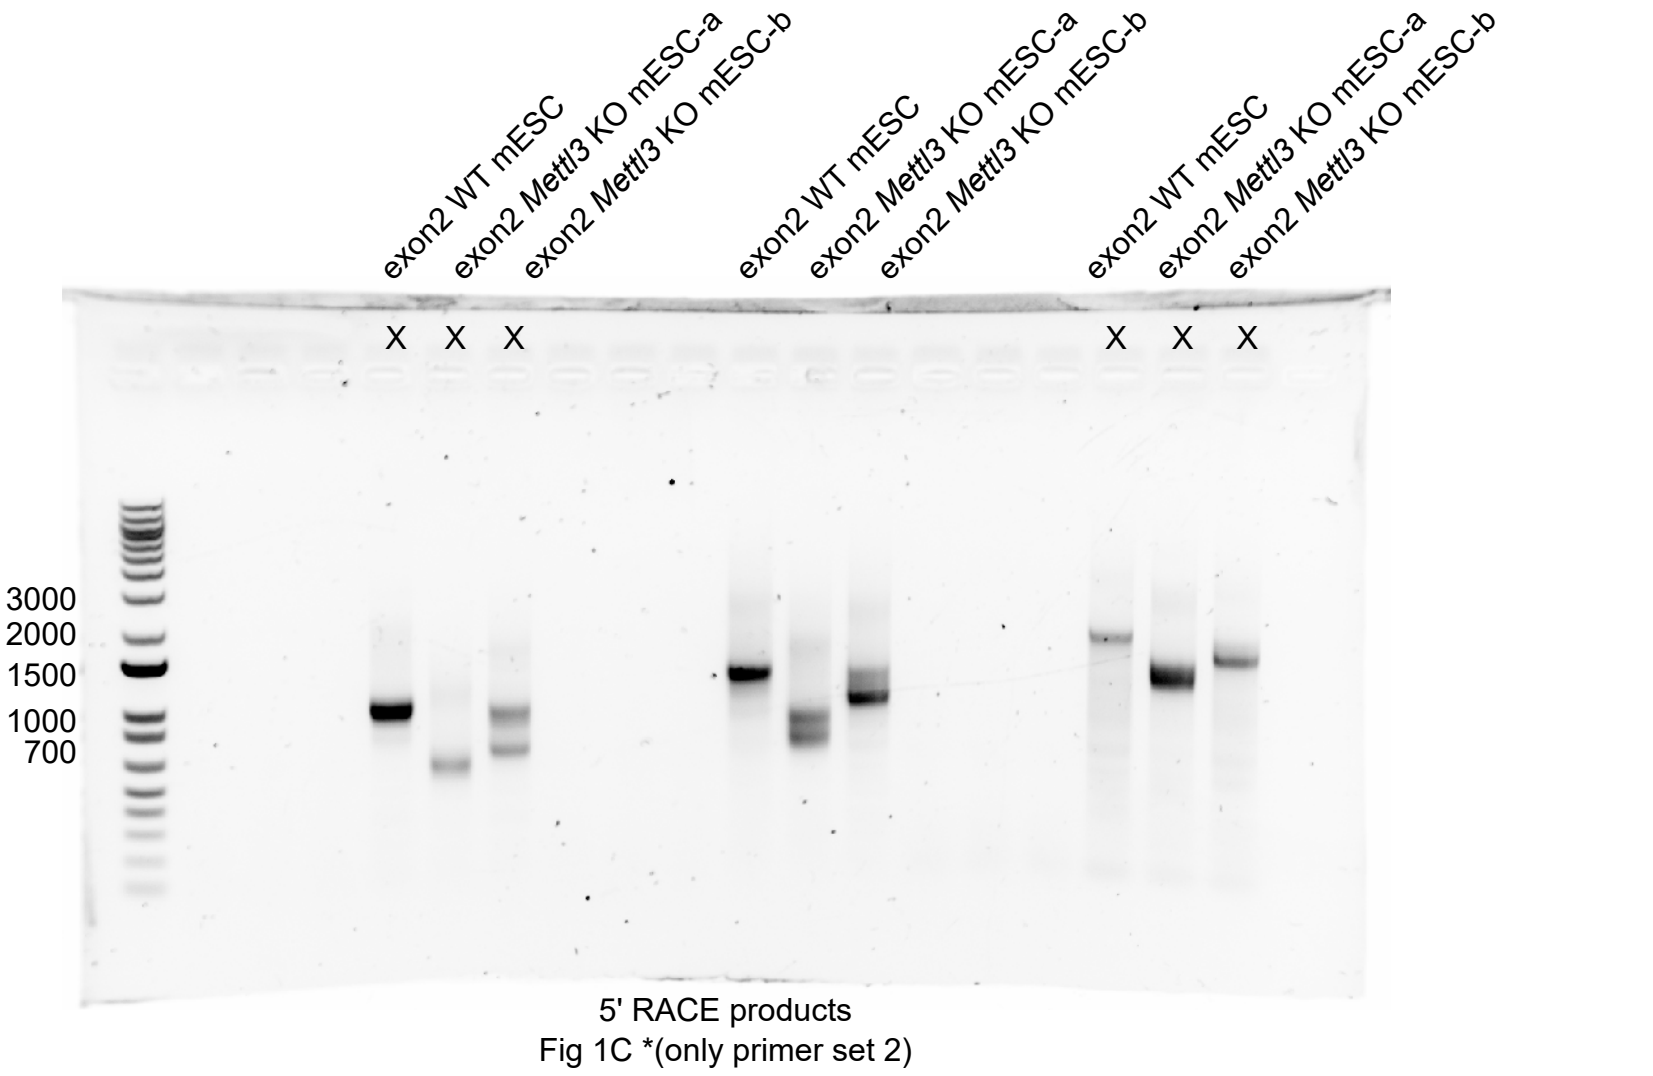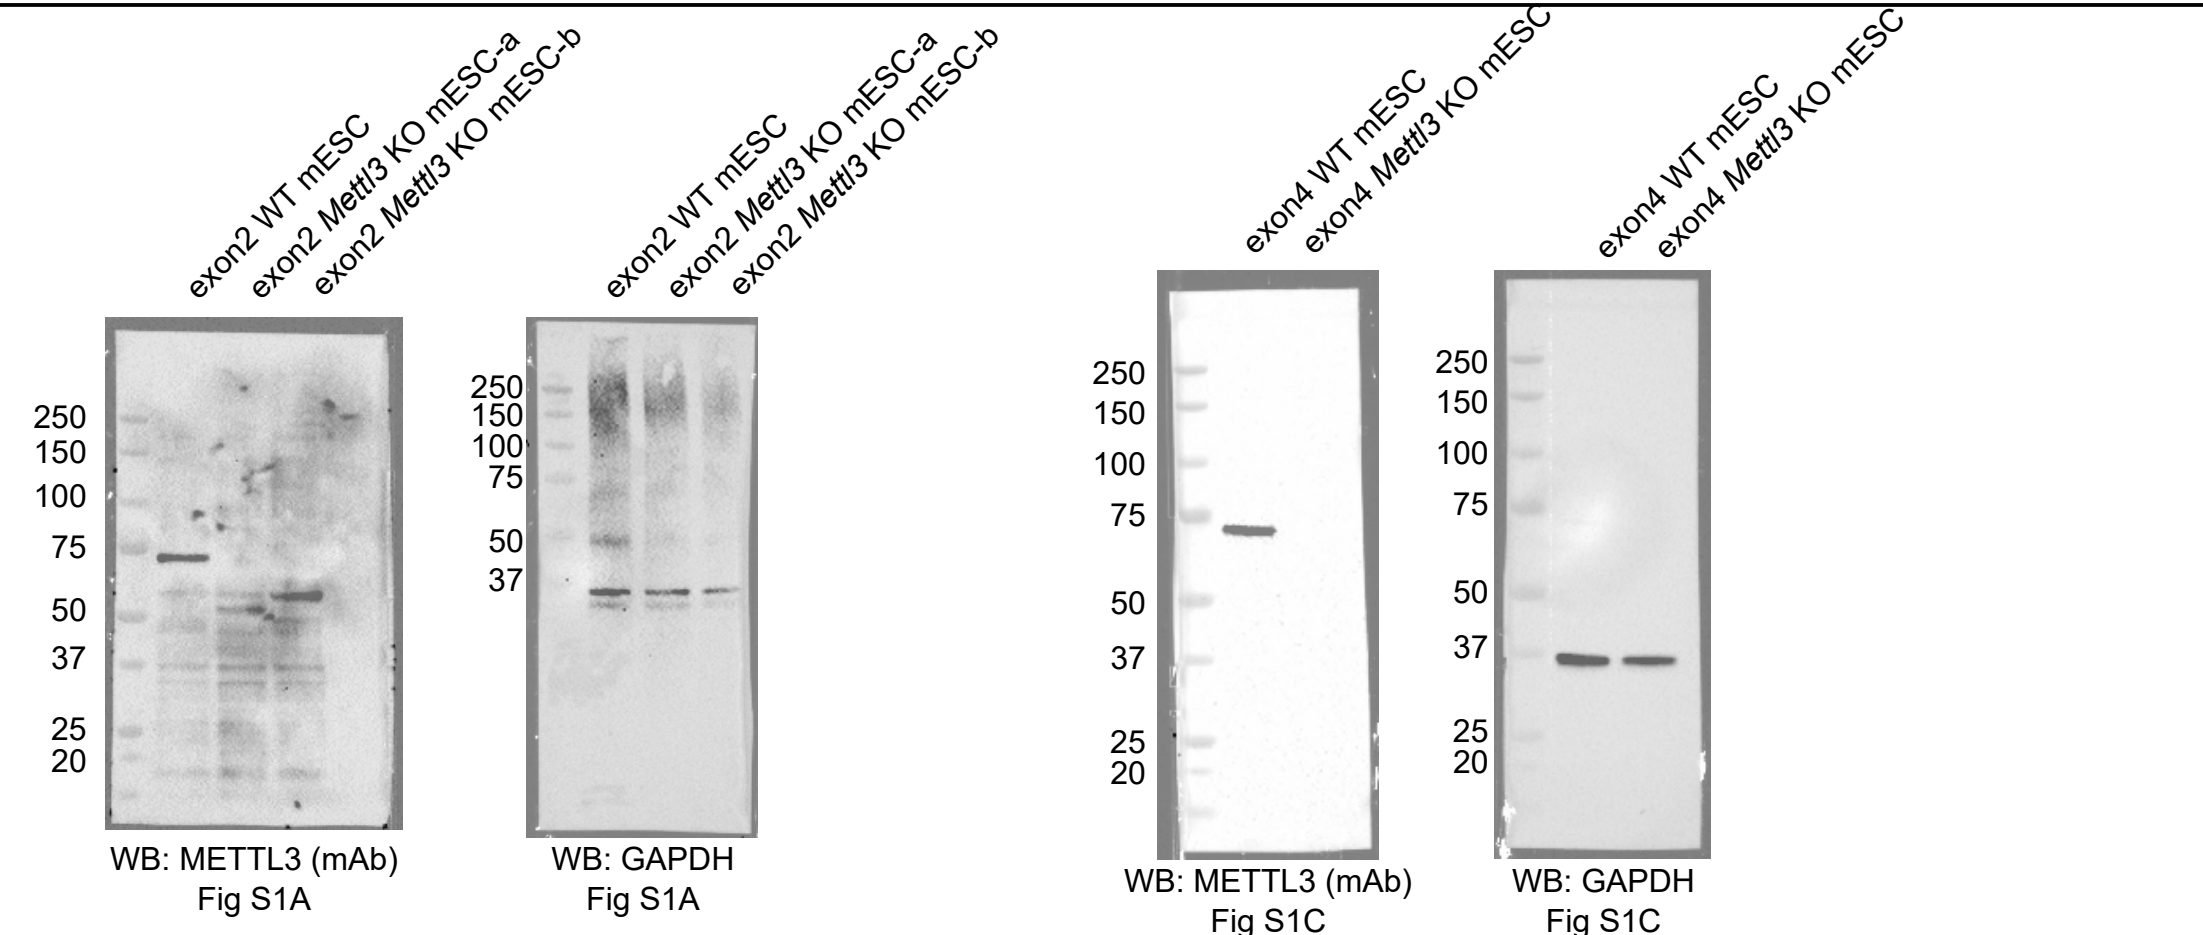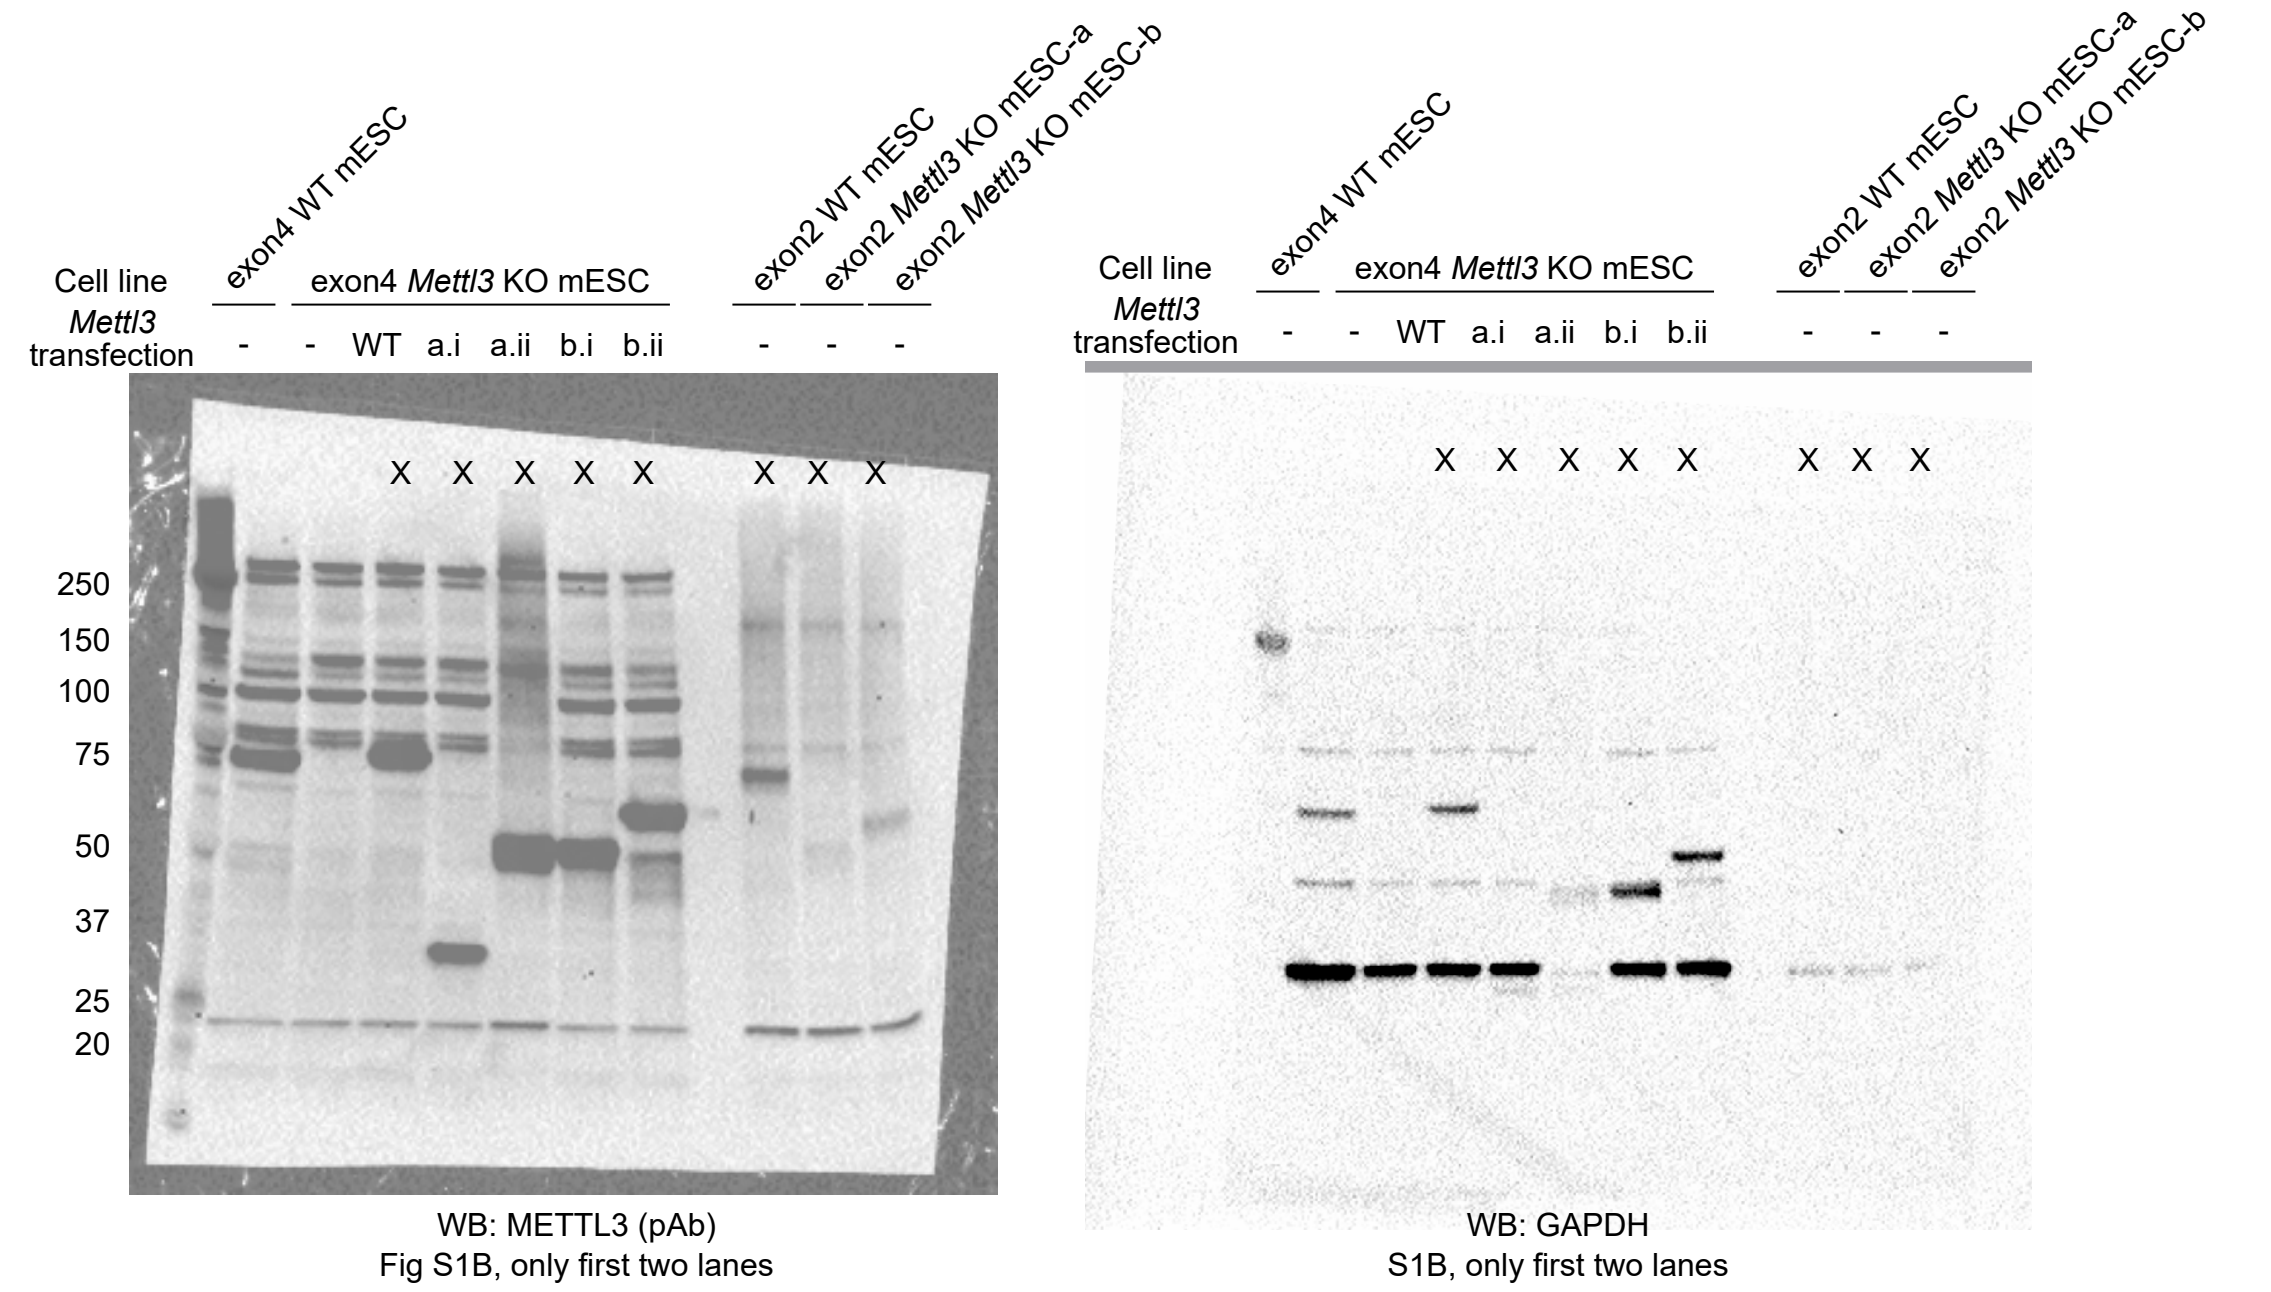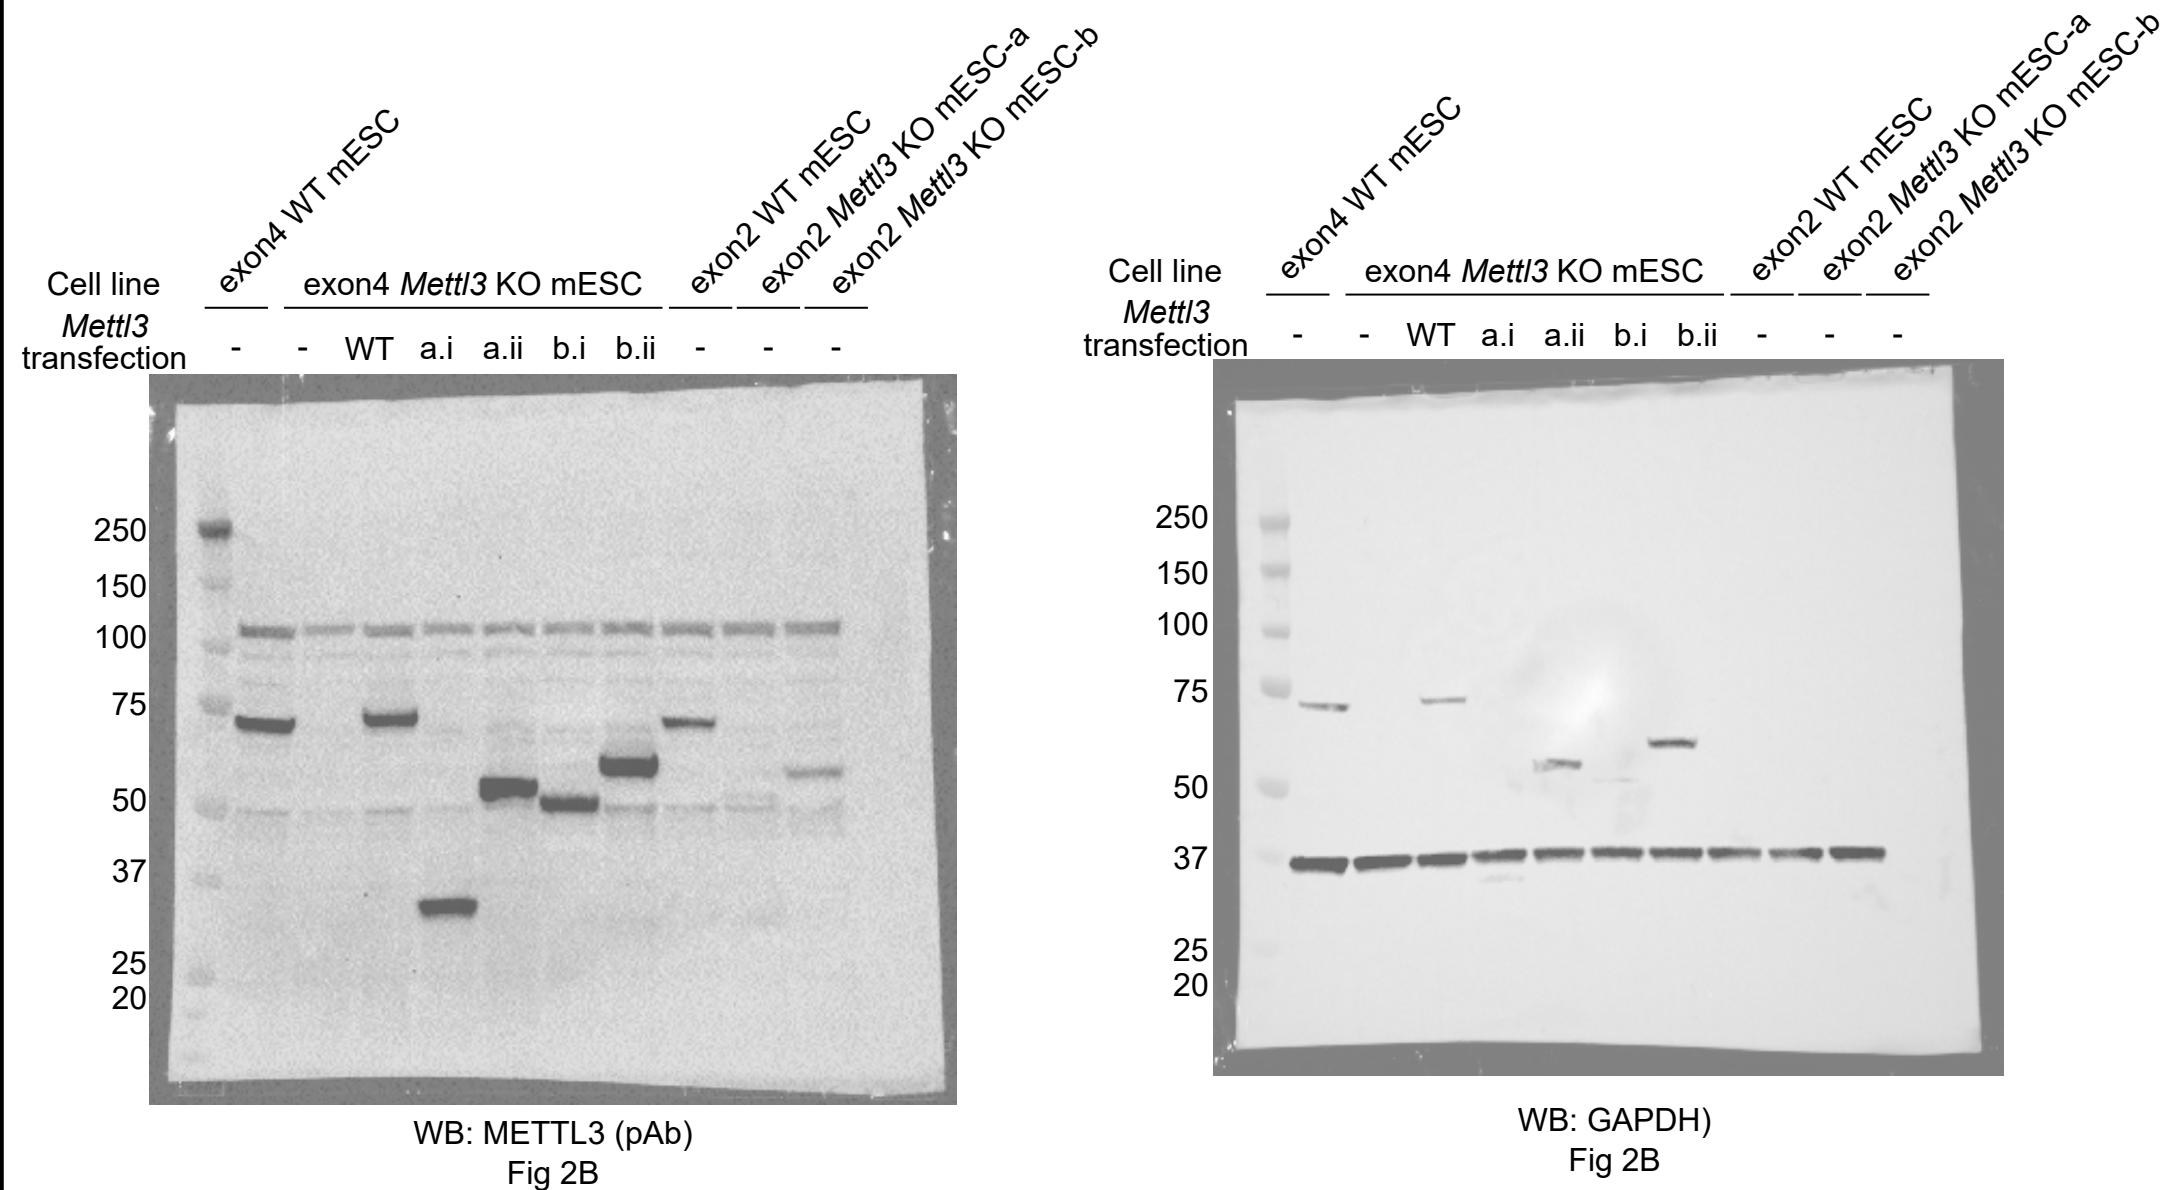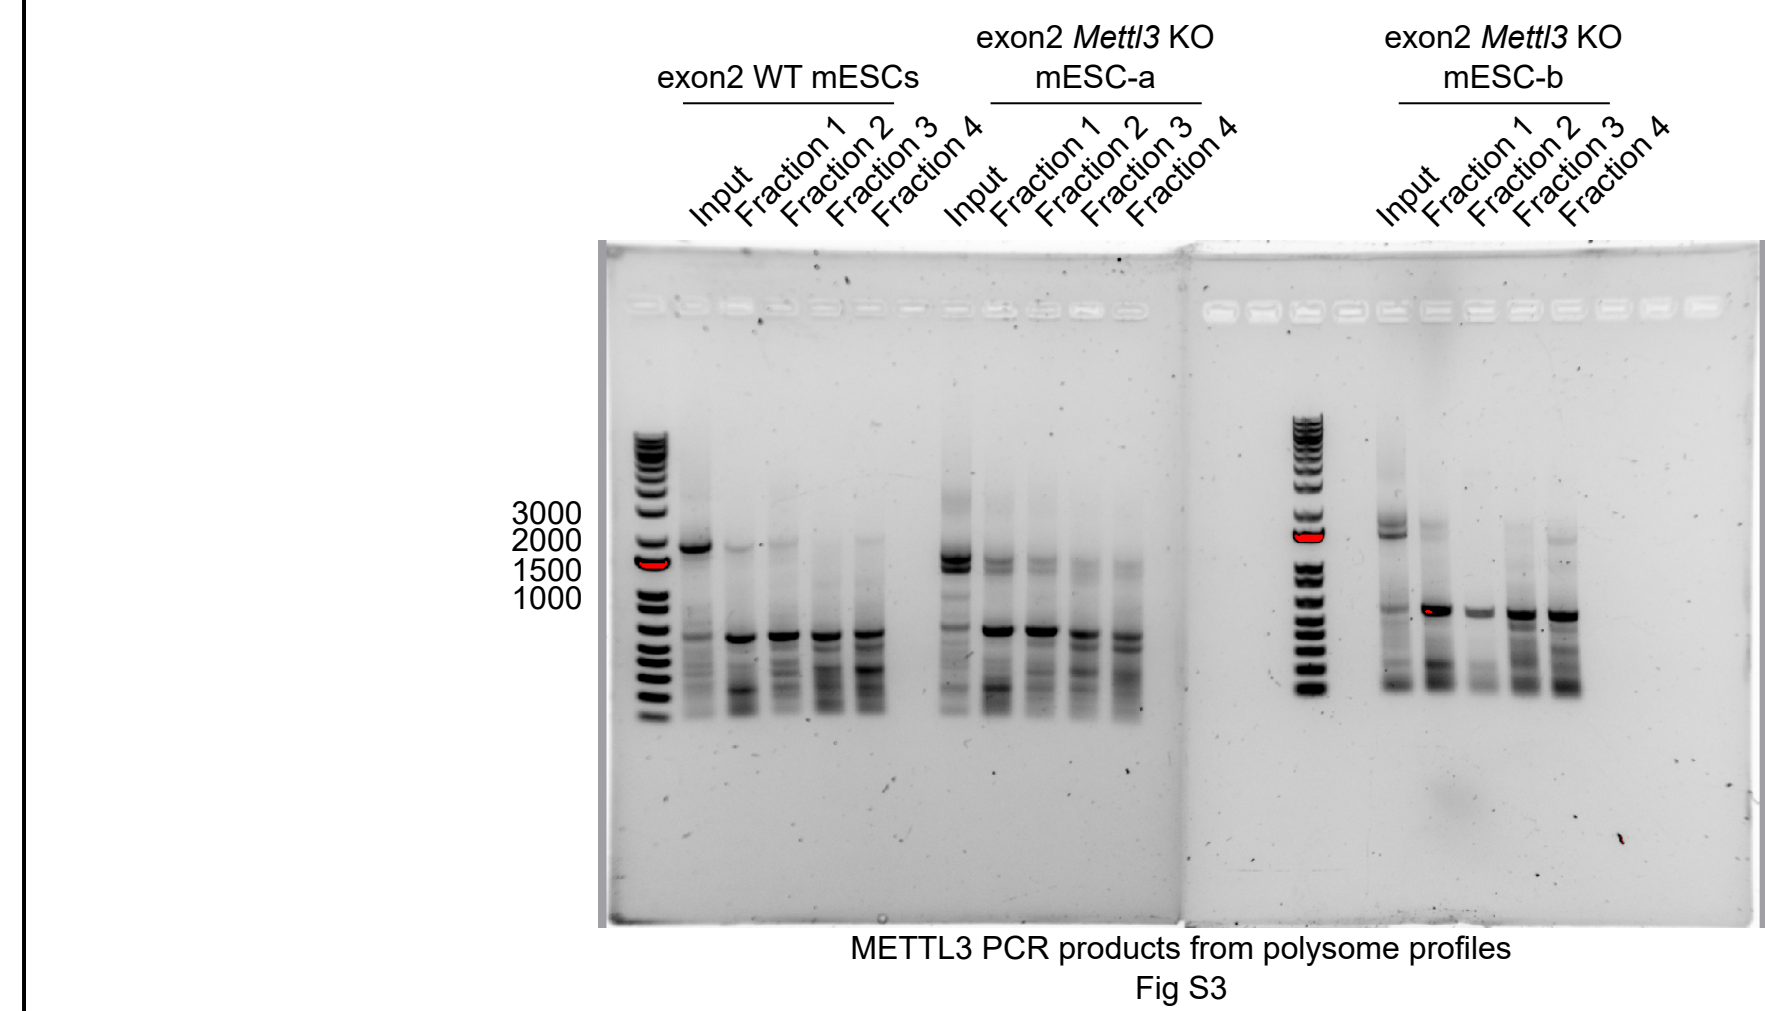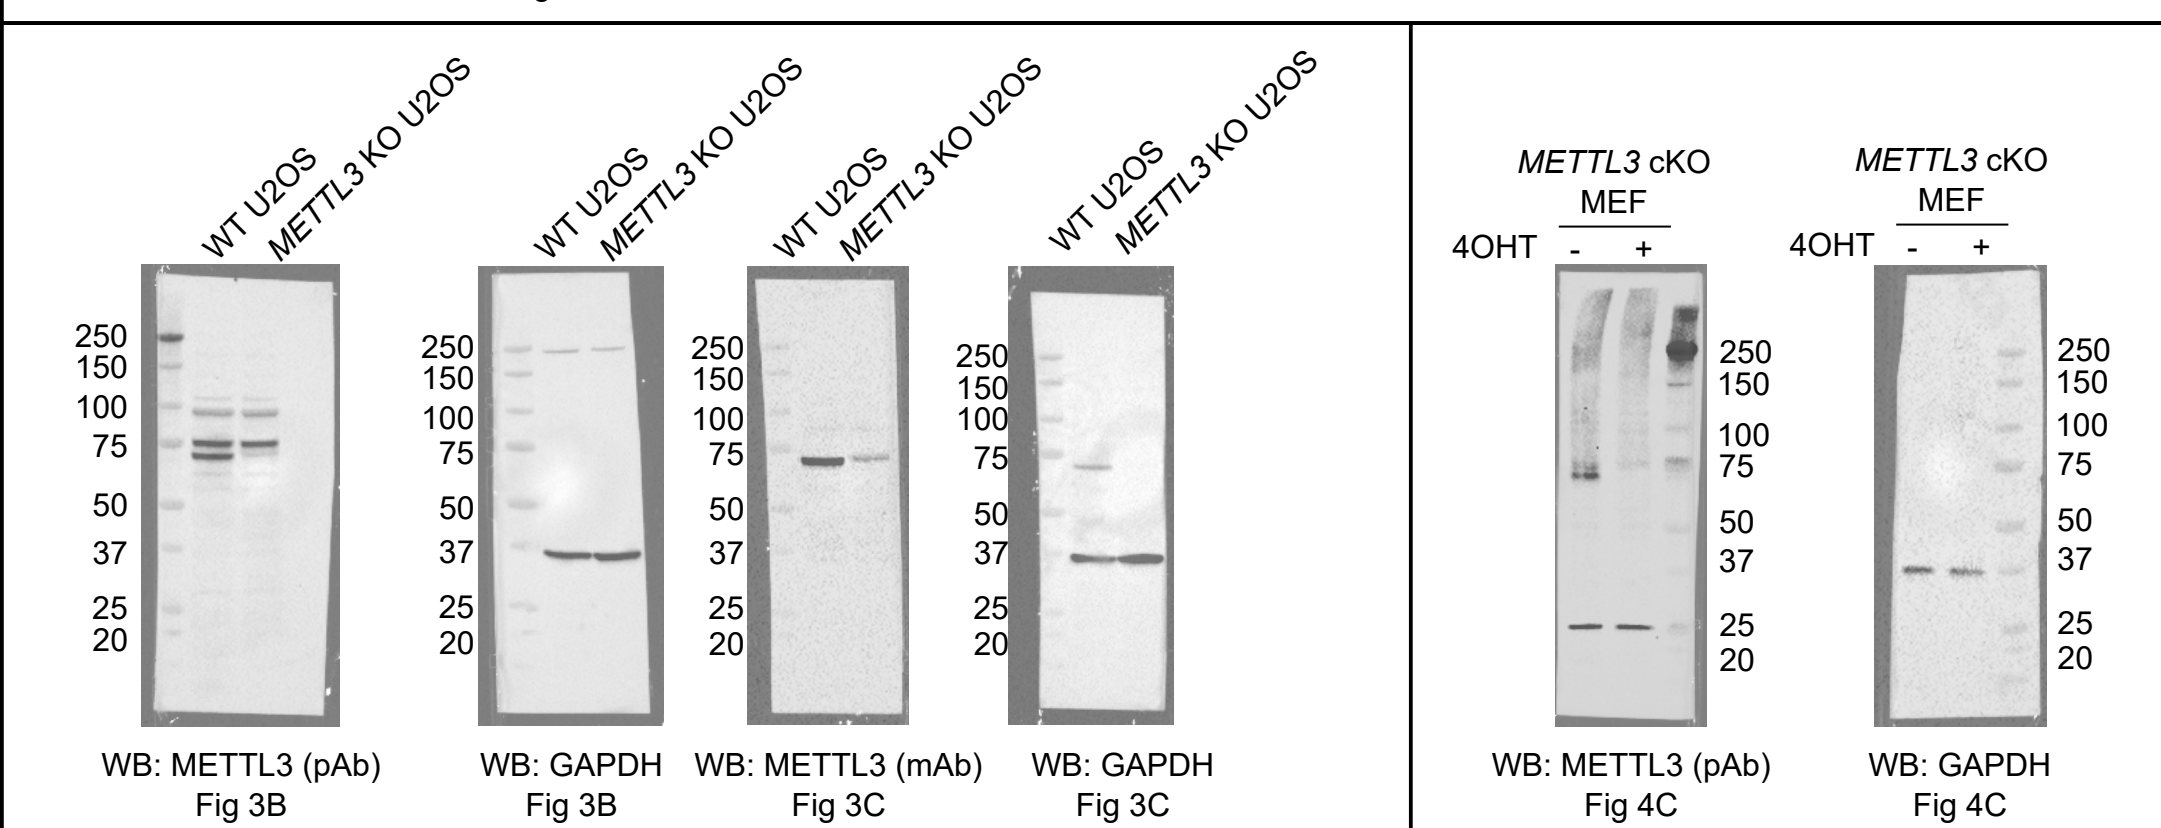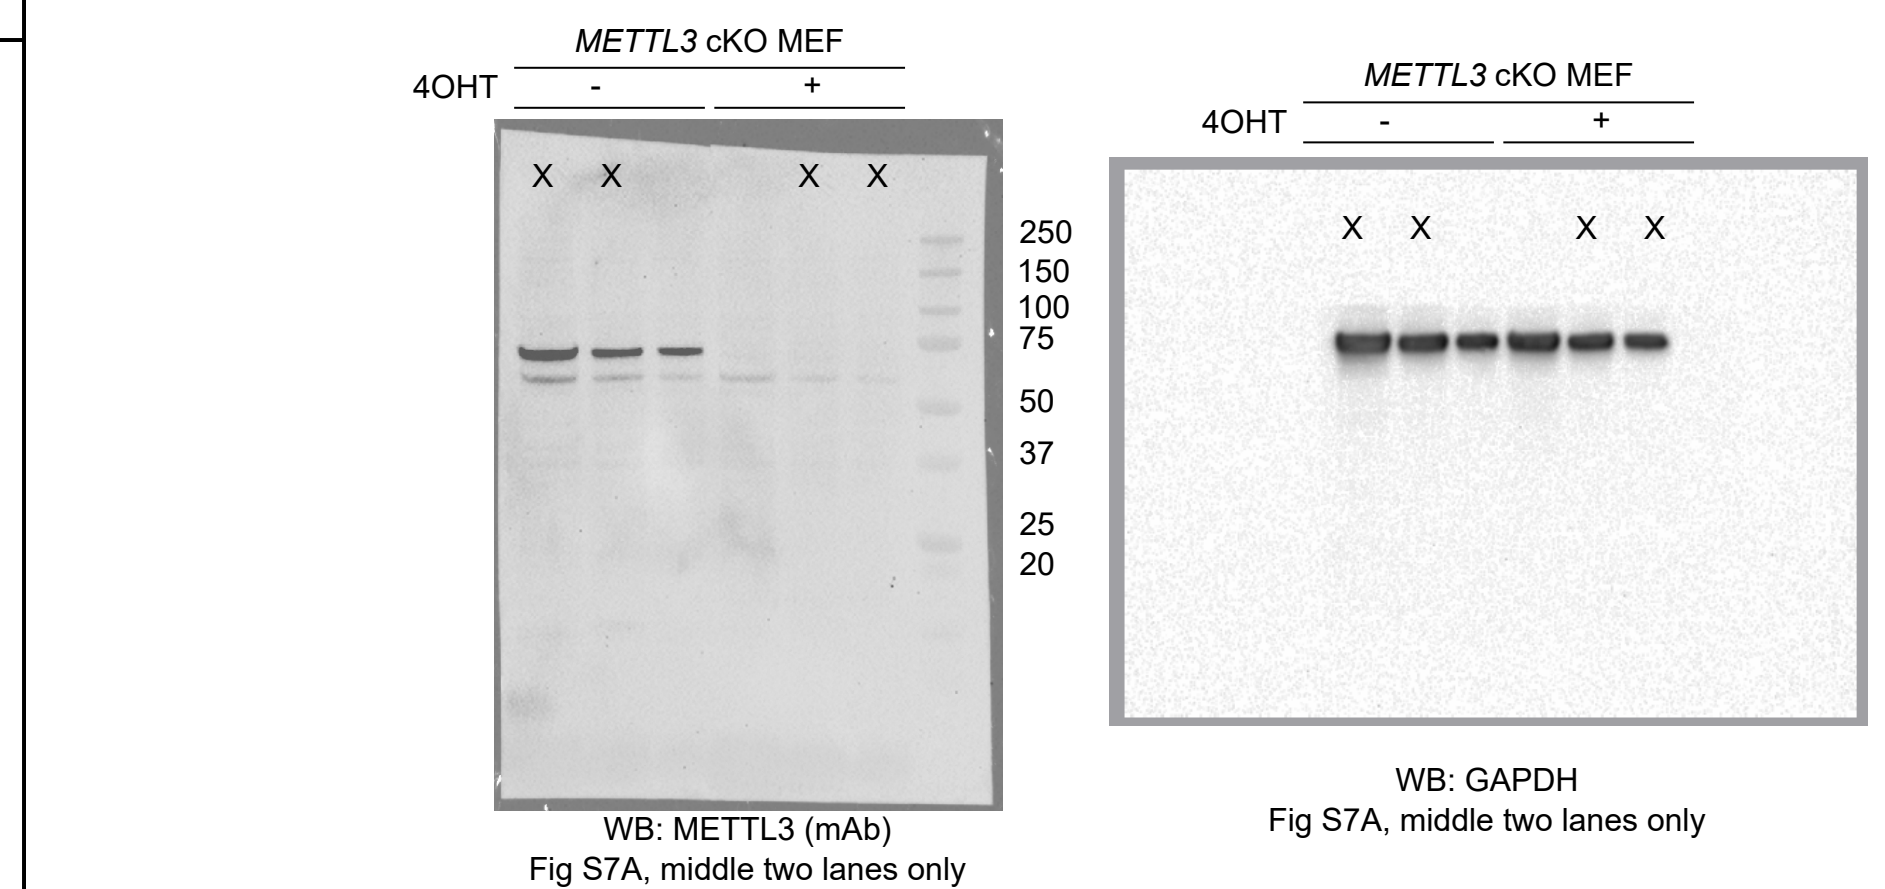

Supplement: pbio.3001683.s014.pdf [file pbio.3001683.s014.pdf]
